# Supplementary material for: On the direct correlation between the copper current collector surface area and ‘dead Li’ formation in zero-excess Li metal batteries
Source: Royal Society of Chemistry journal article supplement (doi:10.1039/d3ta00097d), 2023-01-01
Supplement: d3ta00097d1.pdf [file d3ta00097d1.pdf]

## Supporting Information

# On the Direct Correlation between the Copper Current Collector Surface Area and 'Dead Li' Formation in Zero Excess Li Metal Batteries

*Egy Adhitama,<sup>a,b,\*‡</sup> Andam Deatama Refino,<sup>d,e,‡</sup> Tobias Brake,<sup>a</sup> Jan Pleie,<sup>a,b</sup> Christina Schmidt,<sup>c</sup> Feleke Demelash,<sup>a</sup> Kerstin Neuhaus,<sup>c</sup> Steffen Bornemann,<sup>d</sup> Simon Wiemers-Meyer,<sup>a</sup> Erwin Peiner,<sup>d</sup> Martin Winter,<sup>a,c</sup> Hutomo Suryo Wasisto,<sup>f</sup> Tobias Placke,<sup>a,\*</sup>*

<sup>a</sup> University of Münster, MEET Battery Research Center, Institute of Physical Chemistry, Corrensstr. 46, 48149 Münster, Germany

<sup>b</sup> University of Münster, International Graduate School for Battery Chemistry, Characterization, Analysis, Recycling and Application (BACCARA), Corrensstr. 40, 48149 Münster, Germany

<sup>c</sup> Helmholtz Institute Münster, IEK-12, Forschungszentrum Jülich GmbH, Corrensstr. 46, 48149 Münster, Germany

<sup>d</sup> Institute of Semiconductor Technology (IHT) and Laboratory for Emerging Nanometrology (LENA), Technische Universität Braunschweig, Hans-Sommer-Straße 66, 38106, Braunschweig, Germany

<sup>e</sup> Engineering Physics Program, Institut Teknologi Sumatera (ITERA), Jl. Terusan Ryacudu, Way Huwi, 35365 Lampung Selatan, Indonesia

<sup>f</sup> PT Nanosense Instrument Indonesia, Umbulharjo, Yogyakarta, 55167, Indonesia

**‡E. Adhitama and A. D. Refino contributed equally to this work.**

\*Correspondence: [egyadhitama@uni-muenster.de](mailto:egyadhitama@uni-muenster.de) (EA) and [tobias.placke@uni-muenster.de](mailto:tobias.placke@uni-muenster.de) (TP)

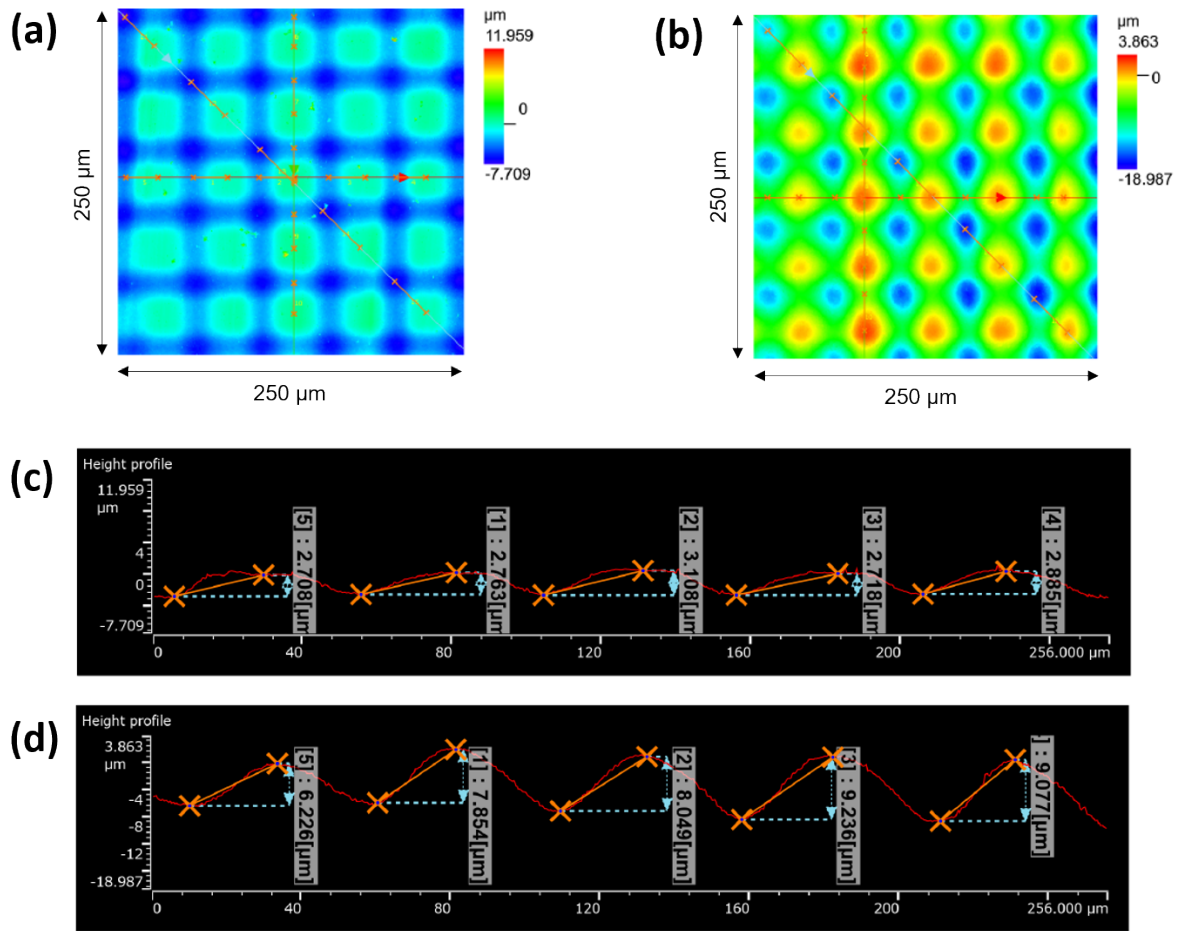

**Figure S1.** Confocal laser scanning microscope (CLSM) images showing the top-view colored contour profile of (a) Cu/B and (b) Cu/C. Depth profiles of (c) Cu/B and (d) Cu/C display different depths resulting from different laser powers and numbers of repetitions.

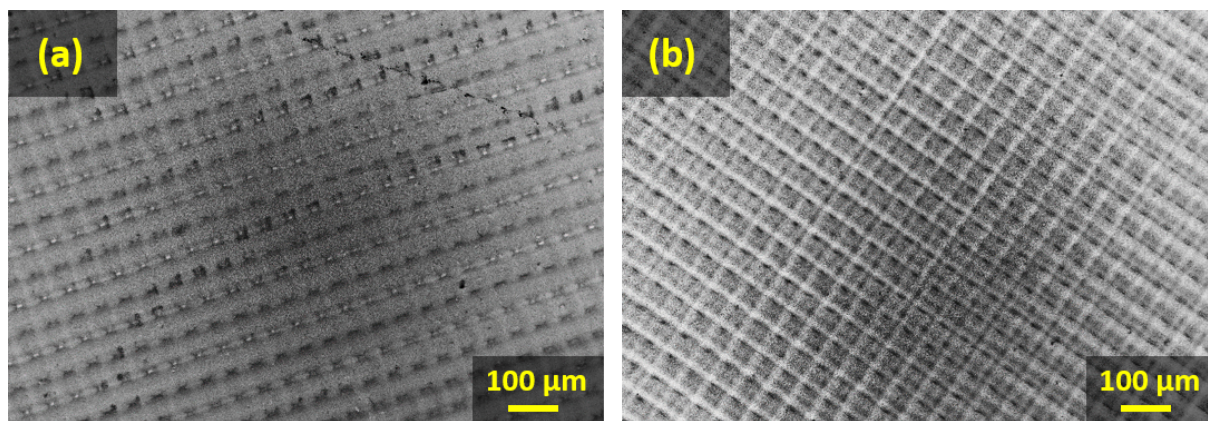

**Figure S2.** Low-magnification top-view SEM images showing the ordered tortuosity of (a) Cu/B and (b) Cu/C.

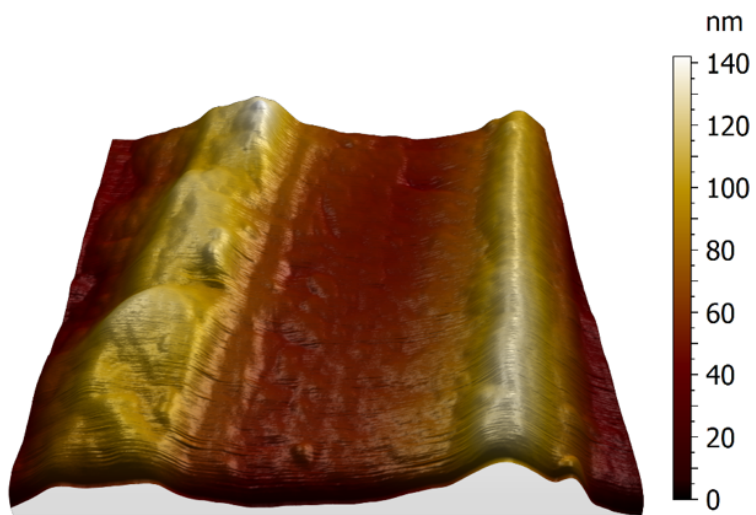

**Figure S3.** 3D topography images ( $2\ \mu\text{m} \times 2\ \mu\text{m}$ ) taken with AFM technique of Cu/A

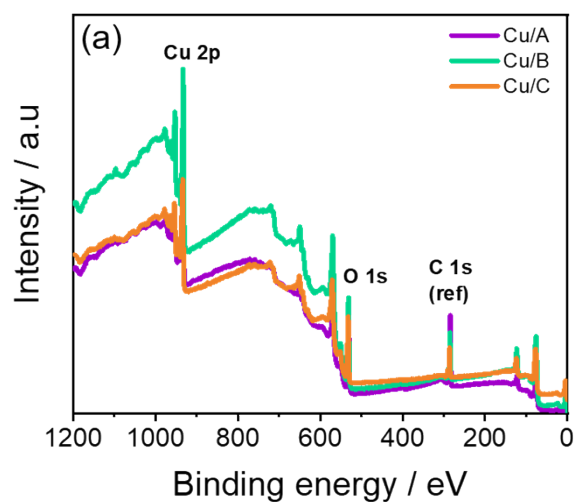

(b)

| Samples | Cu 2p / at%  | O 1s / at%   |
|---------|--------------|--------------|
| Cu/A    | 41.42 ± 6.76 | 58.58 ± 6.76 |
| Cu/B    | 45.40 ± 2.04 | 54.60 ± 2.04 |
| Cu/C    | 46.86 ± 0.54 | 53.14 ± 0.54 |

**Figure S4.** (a) Full XPS core spectrum for all Cu CC samples. (b) Associated atomic concentration ratios of all Cu CC derived from the survey scan for Cu 2p and O 1s.

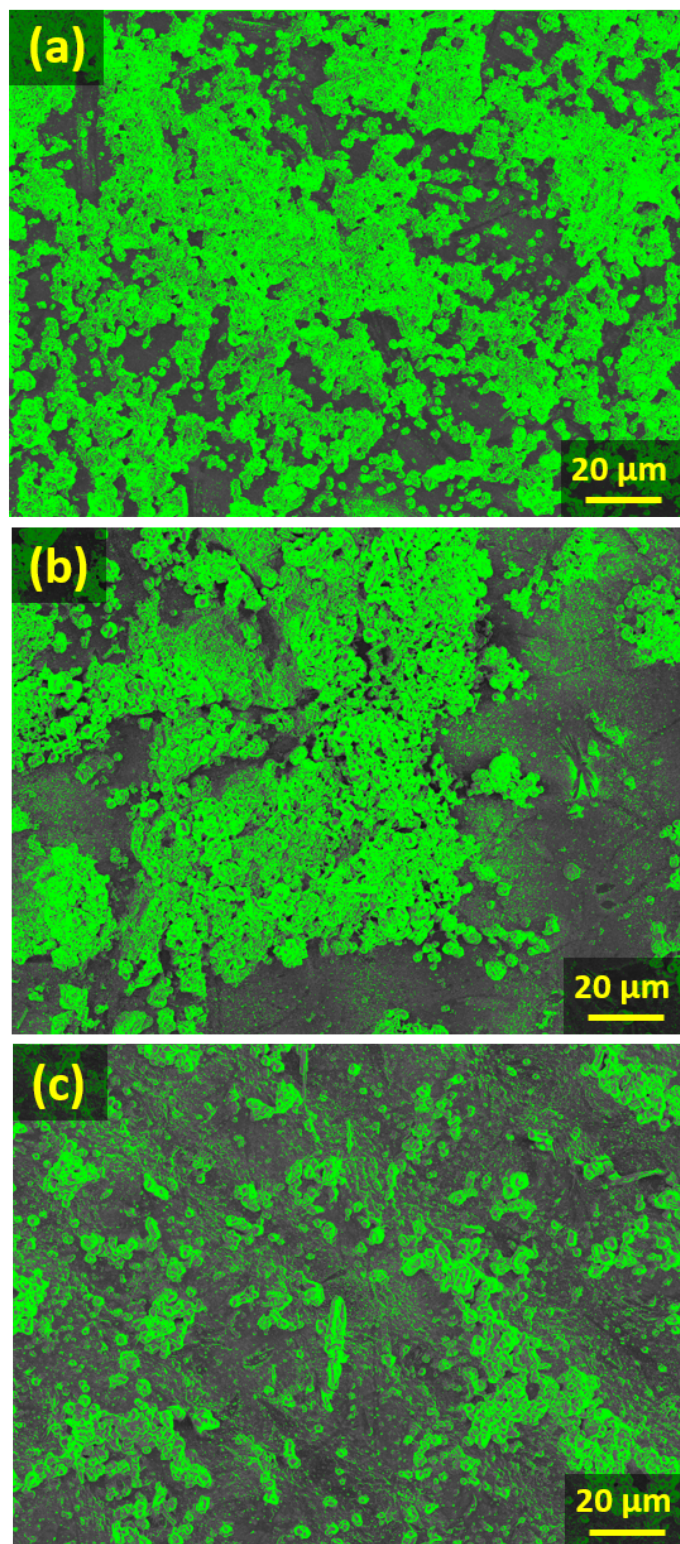

**Figure S5.** Low magnification top-view SEM images of the ‘dead Li’ on (a) Cu/A, (b) Cu/B, and (c) Cu/C. Green color indicates the accumulated ‘dead Li’. All samples were cycled for 50 cycles at  $0.5 \text{ mA cm}^{-2}$  for  $0.5 \text{ mAh cm}^{-2}$ . The measurements were taken in a stripped state from  $\text{Cu} \parallel \text{Li}$  metal cells.

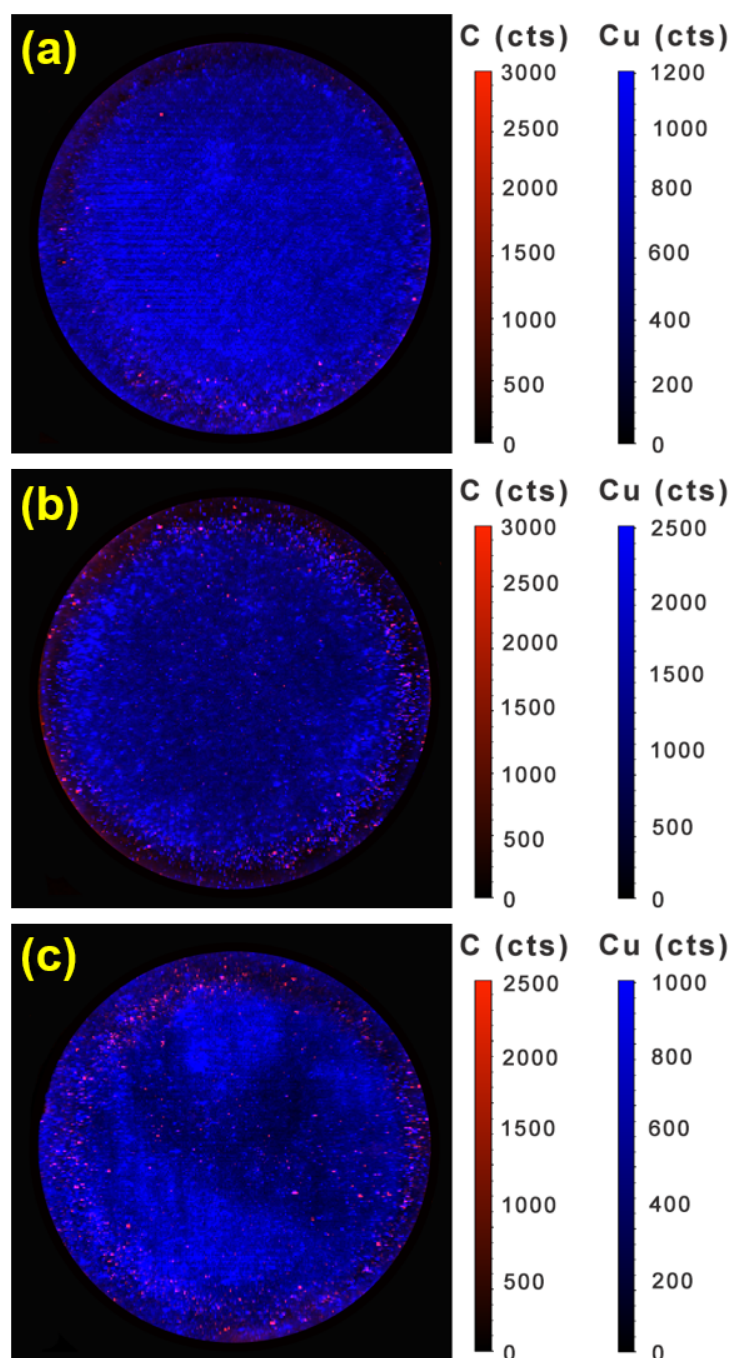

**Figure S6.** C and Cu element observation at the entire Cu CC electrode surface after 50 cycles in Cu || Li metal cells visualized and analyzed by LA-ICP-MS of (a) Cu/A, (b) Cu/B, and (c) Cu/C.

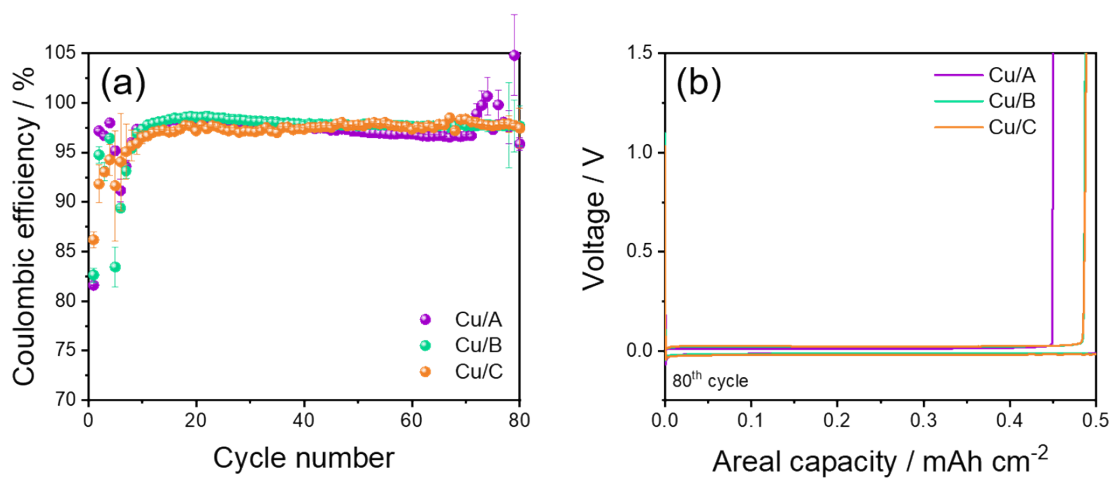

**Figure S7.** (a) Cycling performance of the three Cu || Li metal cells at 0.025 mA cm<sup>-2</sup> for the first three cycles followed by 0.5 mA cm<sup>-2</sup> for subsequent cycles. (b) Electrochemical voltage profile of the 80<sup>th</sup> cycle for lithium plating and stripping of all three samples. The areal capacity was 0.5 mAh cm<sup>-2</sup>.



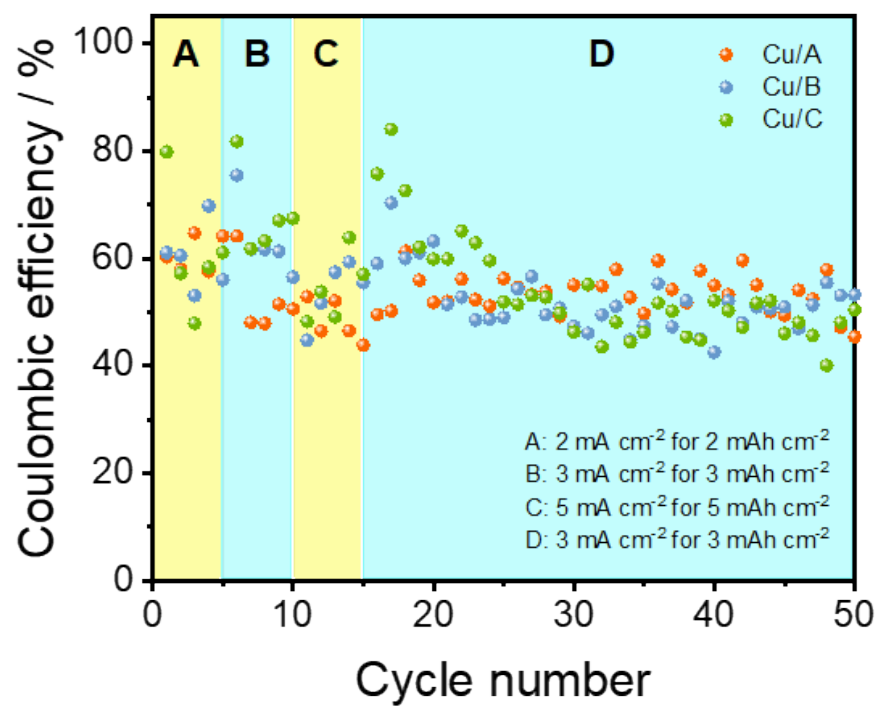

**Figure S8.** Electrochemical stability profile of the three Cu || Li metal cells at various high current densities and high areal capacities.

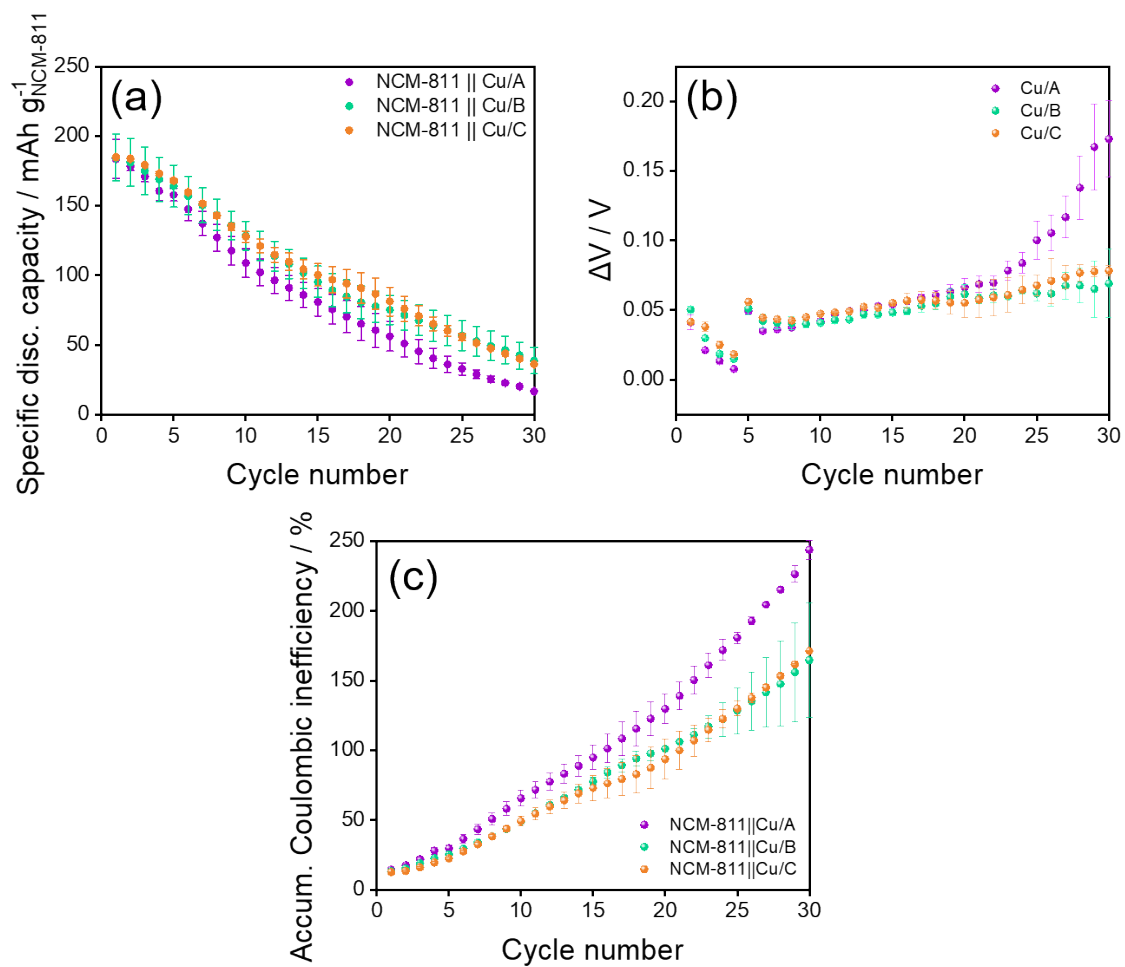

**Figure S9.** (a) Specific capacity vs. cycle number plots, (b)  $\Delta V$  vs. cycle number plots, and (c) Accumulated Coulombic inefficiency vs. cycle number plots of all three Cu electrode samples against NCM-811 as positive electrodes within a cell voltage range of 2.8–4.2 V (at 0.33C).

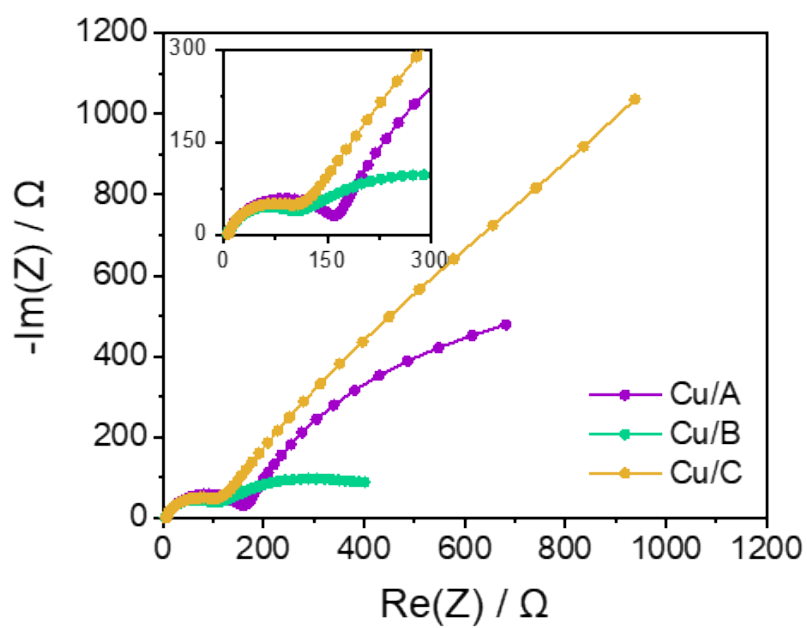

**Figure S10.** EIS spectra of all samples in Cu || Cu symmetric cells. An amount of  $0.5 \text{ mAh cm}^{-2}$  of Li was deposited on one of the electrodes and then kept for rest for 24 h.
